# Supplementary material for: Conversion of oxido-bridged dinuclear ruthenium complex to dicationic dinitrosyl ruthenium complex using proton and nitric oxide: Completion of NO reduction cycle
Source: Royal Society of Chemistry journal article supplement (doi:10.1039/c0dt01002b), 2010-10-13

**(Electronic Supplementary Information)**

**Conversion of oxido-bridged dinuclear ruthenium complex to dicationic dinitrosyl  
ruthenium complex using proton and nitric oxide:  
Completion of NO reduction cycle**

Yasuhiro Arikawa,<sup>\*a</sup> Naoki Matsumoto,<sup>a</sup> Taiki Asayama,<sup>a</sup> Keisuke Umakoshi,<sup>b</sup> and  
Masayoshi Onishi<sup>b</sup>

<sup>a</sup> Graduate School of Science and Technology, Nagasaki University, Bunkyo-machi 1-14,  
Nagasaki 852-8521, Japan. <sup>b</sup> Department of Applied Chemistry, Faculty of  
Engineering, Nagasaki University, Bunkyo-machi 1-14, Nagasaki 852-8521, Japan.

**Contents**

**Figure S1.** <sup>1</sup>H NMR spectrum of [(TpRu)<sub>2</sub>(μ-Cl)(μ-OH)(μ-pz)]BF<sub>4</sub> (**4**) in acetone-d<sub>6</sub>.

**Figure S1.**  $^1\text{H}$  NMR spectrum of  $[(\text{TpRu})_2(\mu\text{-Cl})(\mu\text{-OH})(\mu\text{-pz})]\text{BF}_4$  (**4**) in acetone- $\text{d}_6$ . Impurity peaks are marked with asterisk.

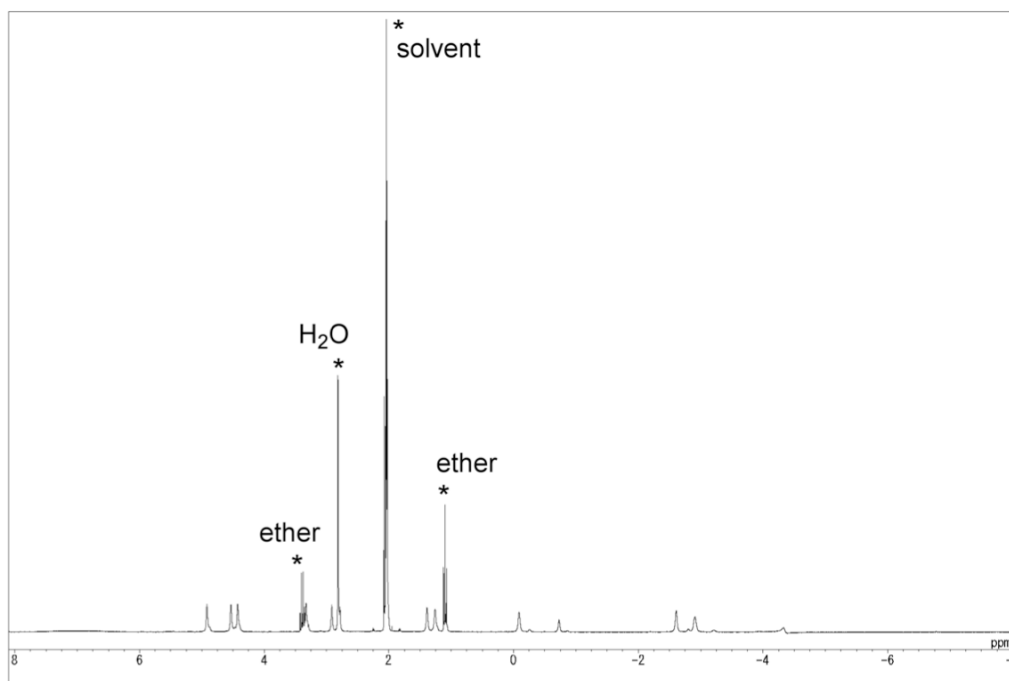

Supplement: c0dt01002b.pdf [file c0dt01002b.pdf]
